# Supplementary material for: A-site-deficiency range identified for in situ exsolution from (La0.4Sr0.6)1−αTi0.95Ni0.05O3±δ electrodes for SOFC and SOEC
Source: Royal Society of Chemistry journal article supplement (doi:10.1039/d4nr02325k), 2024-01-01
Supplement: d4nr02325k1.pdf [file d4nr02325k1.pdf]

## Supplementary for

The A-site deficiency range identified for in-situ exsolution from  $(\text{La}_{0.4}\text{Sr}_{0.6})_{1-\alpha}\text{Ti}_{0.95}\text{Ni}_{0.05}\text{O}_{3\pm\delta}$  electrodes for SOFC and SOEC.

Yao Jiang<sup>a,b</sup>, Chengyu Li<sup>c</sup>, Haonan Huang<sup>a</sup>, Cairong Jiang<sup>a</sup>, Yongjin Chen<sup>c\*</sup>, Yali Yao<sup>b,d</sup>, Jianjun Ma<sup>a\*</sup>

<sup>a</sup> School of Materials Science and Engineering, Sichuan University of Science and Engineering,

Zigong, Sichuan, 643000, PR China

<sup>b</sup> Institute for the Development of Energy for African Sustainability (IDEAS), University of South

Africa, cnr Christiaan de Wet & Pioneer Roads, Roodepoort, Private Bag X6, 1710, South Africa

<sup>c</sup> Center for High Pressure Science and Technology Advanced Research (HPSTAR), Beijing, 100094, P.

R. China

<sup>d</sup> Zhijiang College of Zhejiang University of Technology, Shaoxing, Zhejiang, 312030, P. R. China

Corresponding Author

JM-School of Materials Science and Engineering, Sichuan University of Science and Engineering,  
Zigong, Sichuan, 643000, PR China; ORCID ID:0000-0002-0016-6313; E-mail: [jjma@suse.edu.cn](mailto:jjma@suse.edu.cn);

Tel: +86 15808219478

YC-Center for High Pressure Science and Technology Advanced Research (HPSTAR), Beijing,

100094, P. R. China; E-mail: [yongjin.chen@hpstar.ac.cn](mailto:yongjin.chen@hpstar.ac.cn);

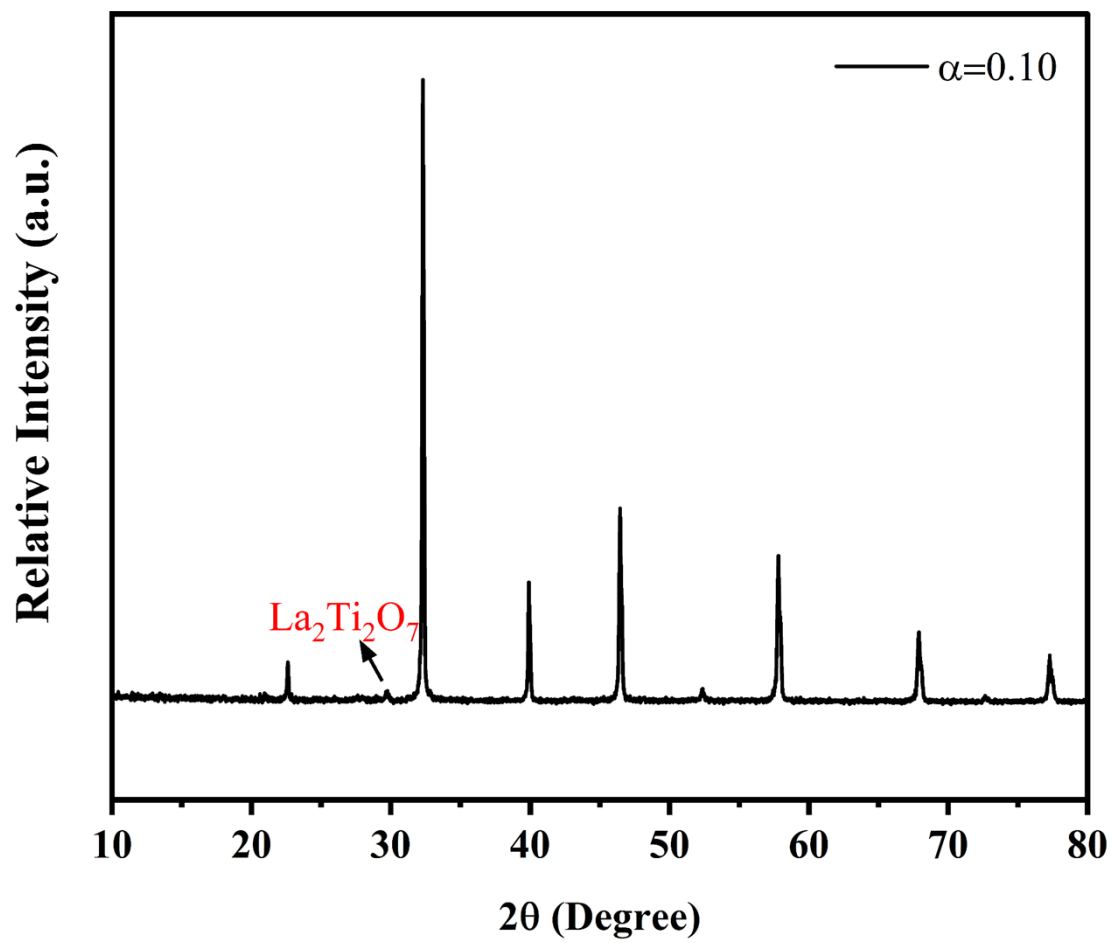

Fig. S1 XRD patterns of LSTN of  $\alpha=0.10$ .

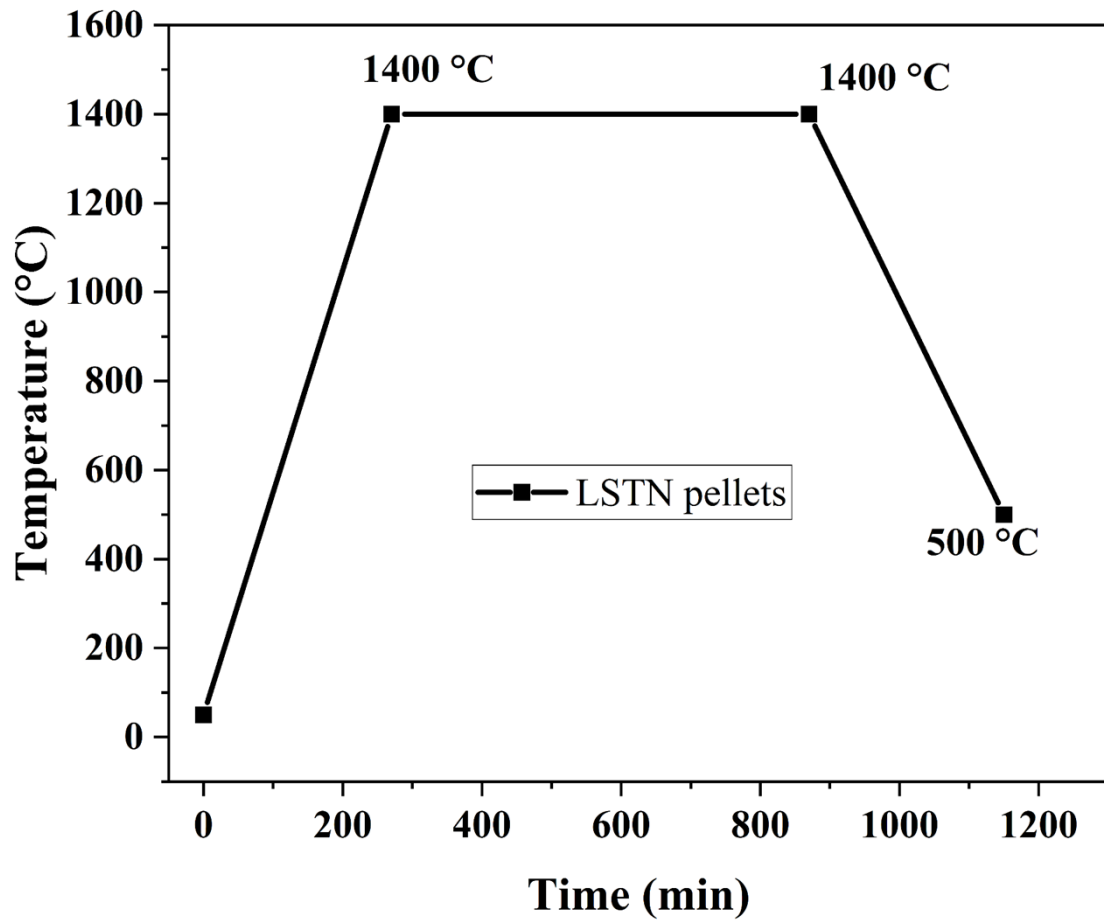

Fig. S2 Uniform sintering curves on samples characterised by sintering properties and conductivity of LSTN with different deficiencies.

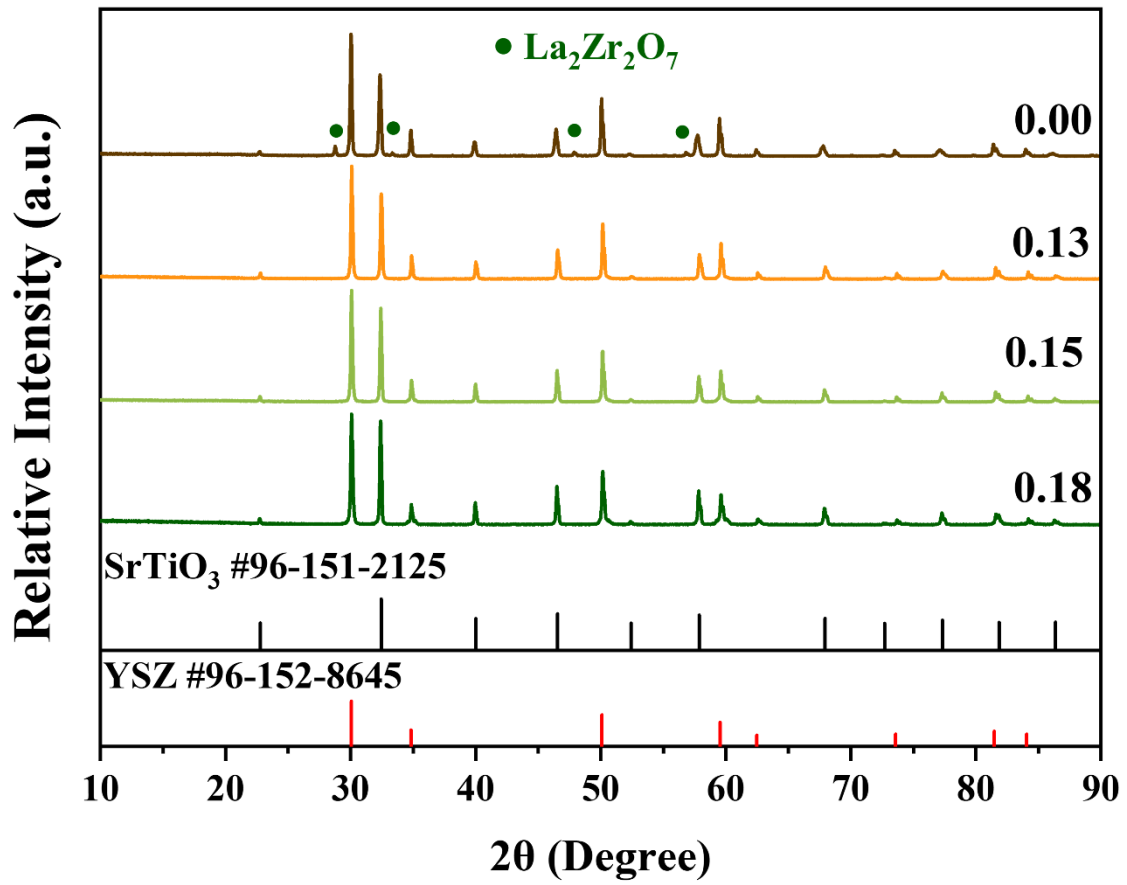

Fig. S3 XRD patterns of LSTN and YSZ mixed powders calcined at 1200 °C for 10 h

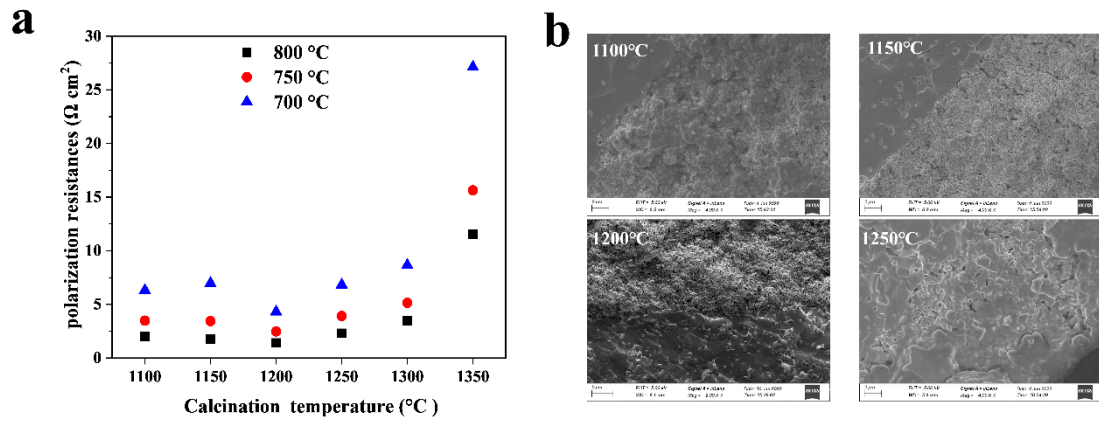

**Fig. S4** Electrochemical performance optimization of LSTN-46-13 electrode at different calcination temperatures. (a) Polarization resistance

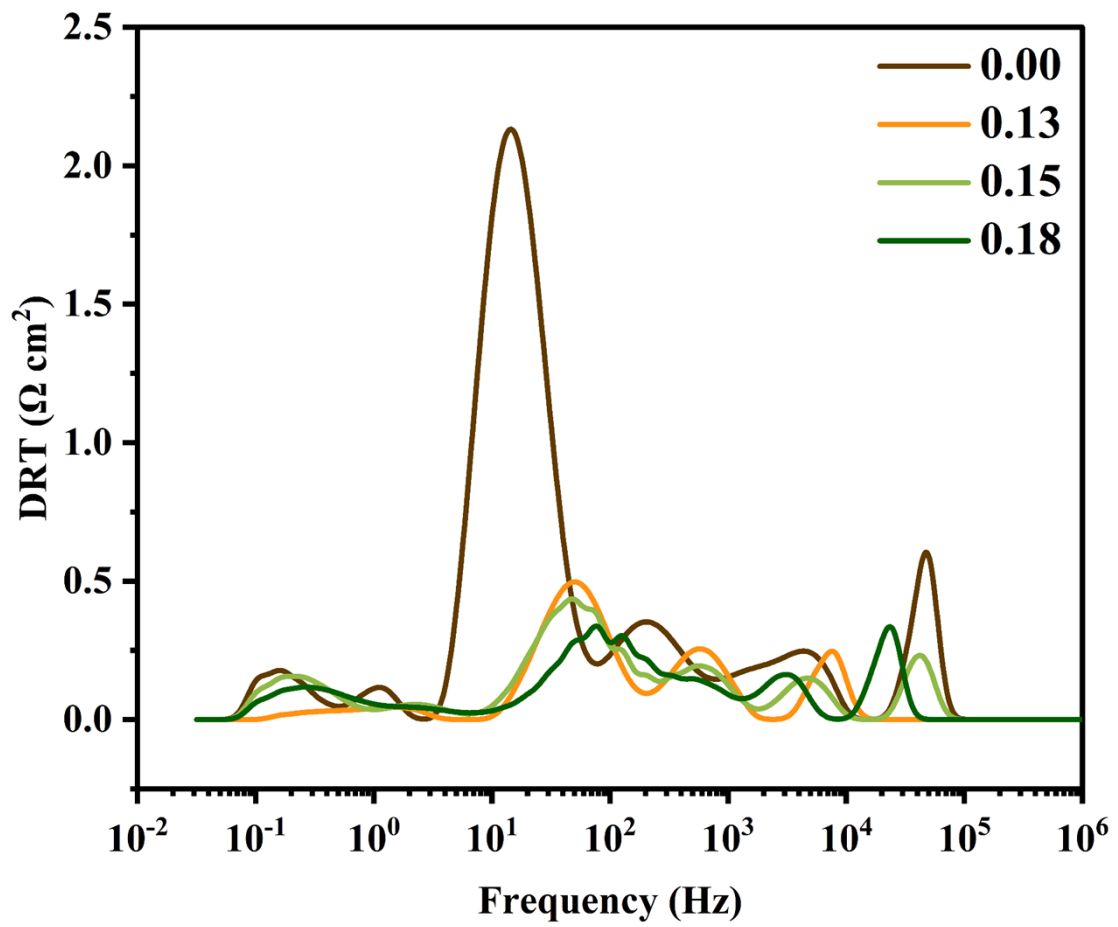

Fig. S5 DRT analysis of impedance spectra data for the LSTN cells at 800 °C

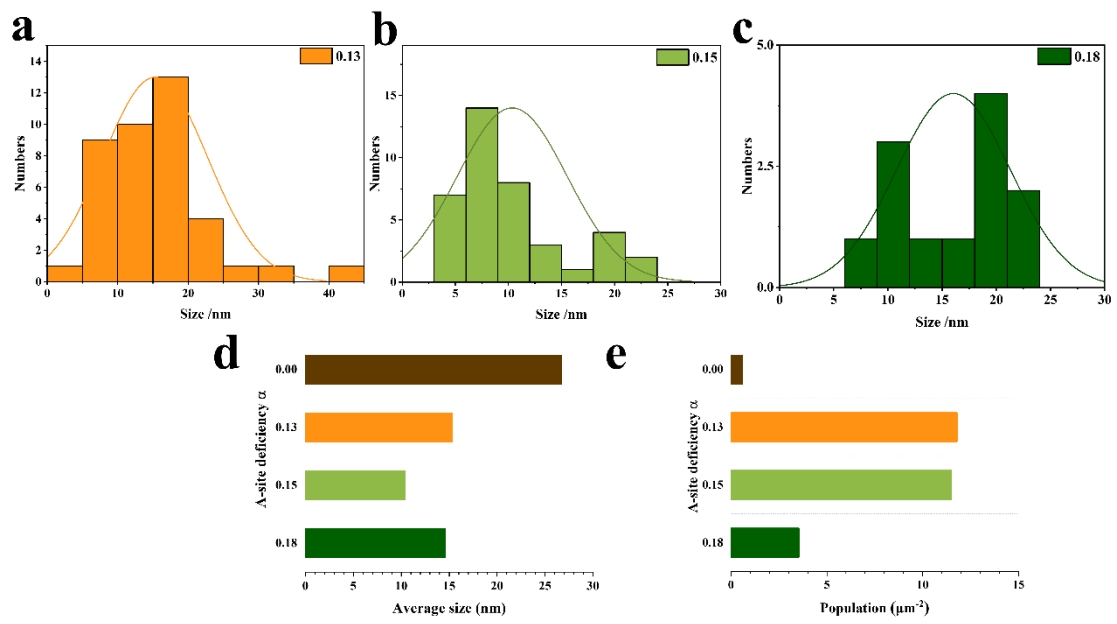

**Fig. S6** Distributions of Ni NPs in LSTN samples after SOFC test ( $\alpha$  value from 0.13 to 0.18), (a)  $\alpha = 0.13$ , (b)  $\alpha = 0.15$ , (c)  $\alpha = 0.18$ . (d) The average size of Ni nanoparticles. (e) The population of Ni nanoparticles.

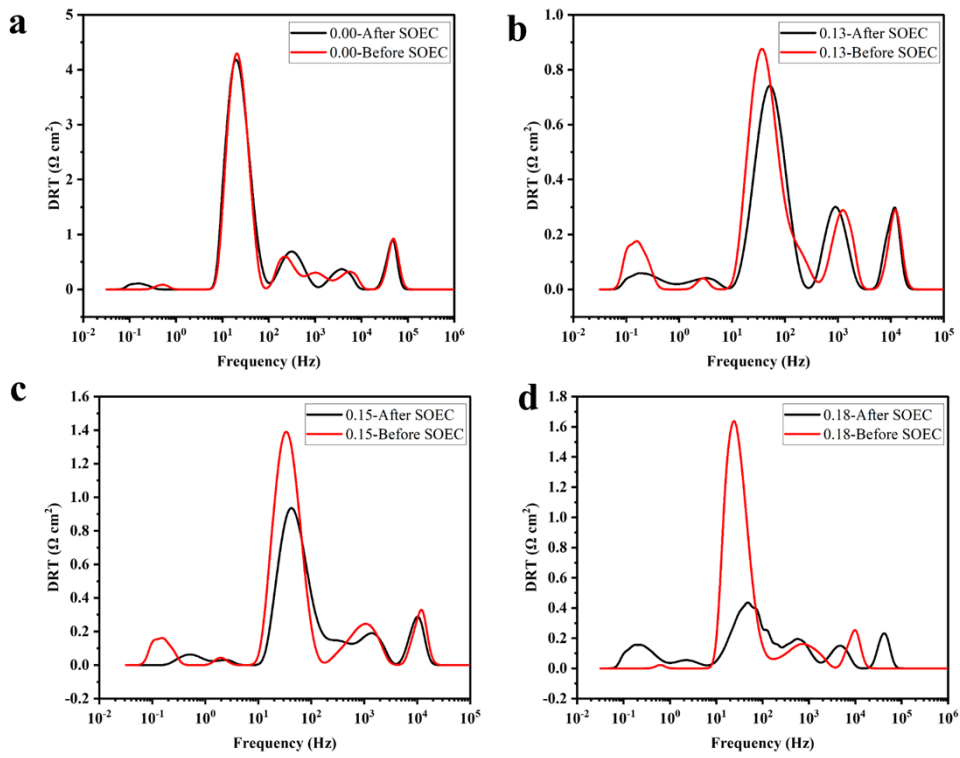

**Fig. S7** DRT analysis of impedance spectra data before and after SOEC test for LSTN with different A site deficiency ( $\alpha$  value from 0.00 to 0.18), (a)  $\alpha = 0.00$ , (b)  $\alpha = 0.13$ , (c)  $\alpha = 0.15$ , (d)  $\alpha = 0.18$ .



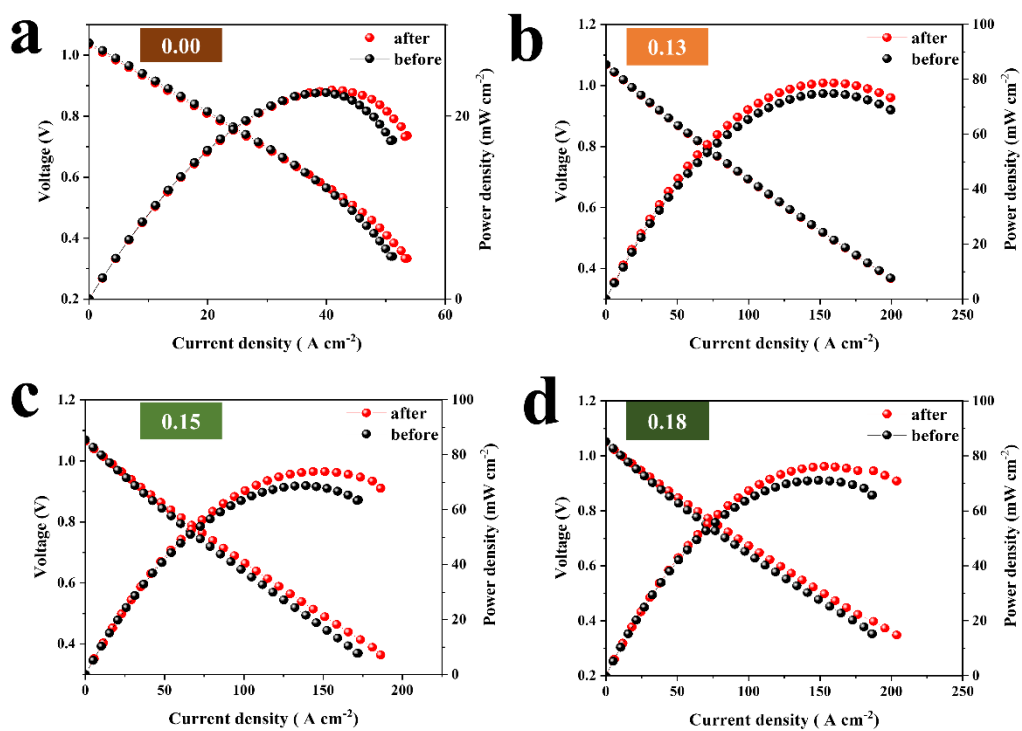

**Fig. S8** The current–voltage curves (800 ° C, wet  $H_2$ ) before and after SOEC test for LSTN with different A site deficiency ( $\alpha$  value from 0.00 to 0.18), (a)  $\alpha = 0.00$ , (b)  $\alpha = 0.13$ , (c)  $\alpha = 0.15$ , (d)  $\alpha = 0.18$ .

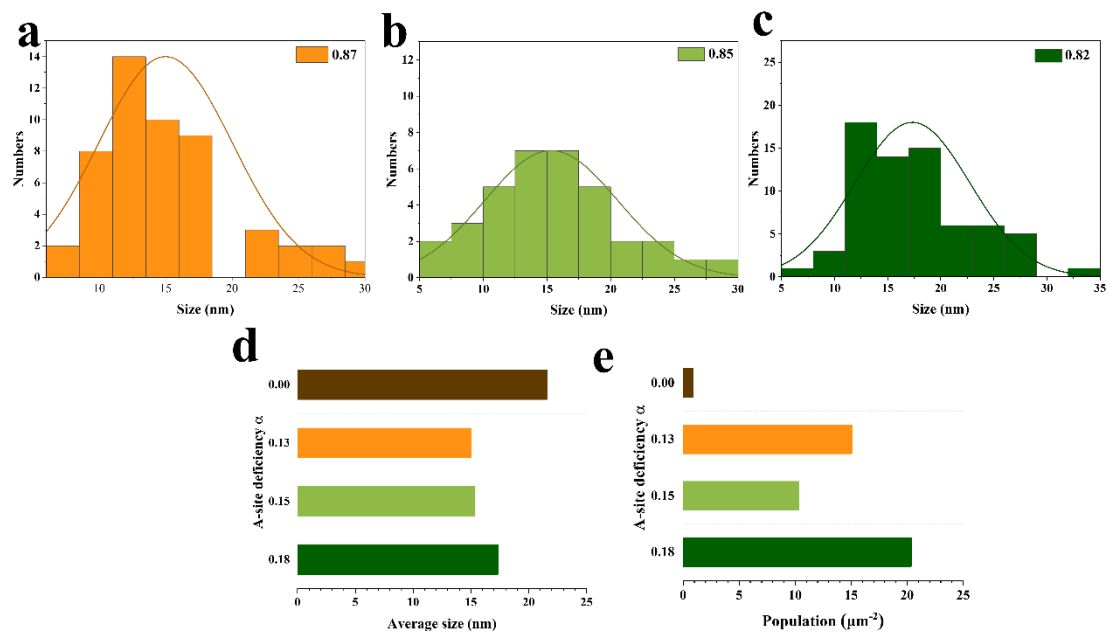

**Fig. S9** The distributions of Ni NPs in LSTN samples after SOEC test ( $\alpha$  value from 0.13 to 0.18), (a)  $\alpha = 0.13$ , (b)  $\alpha = 0.15$ , (c)  $\alpha = 0.18$ . (d) The average diameter of Ni nanoparticles. (e) The population of Ni nanoparticles.

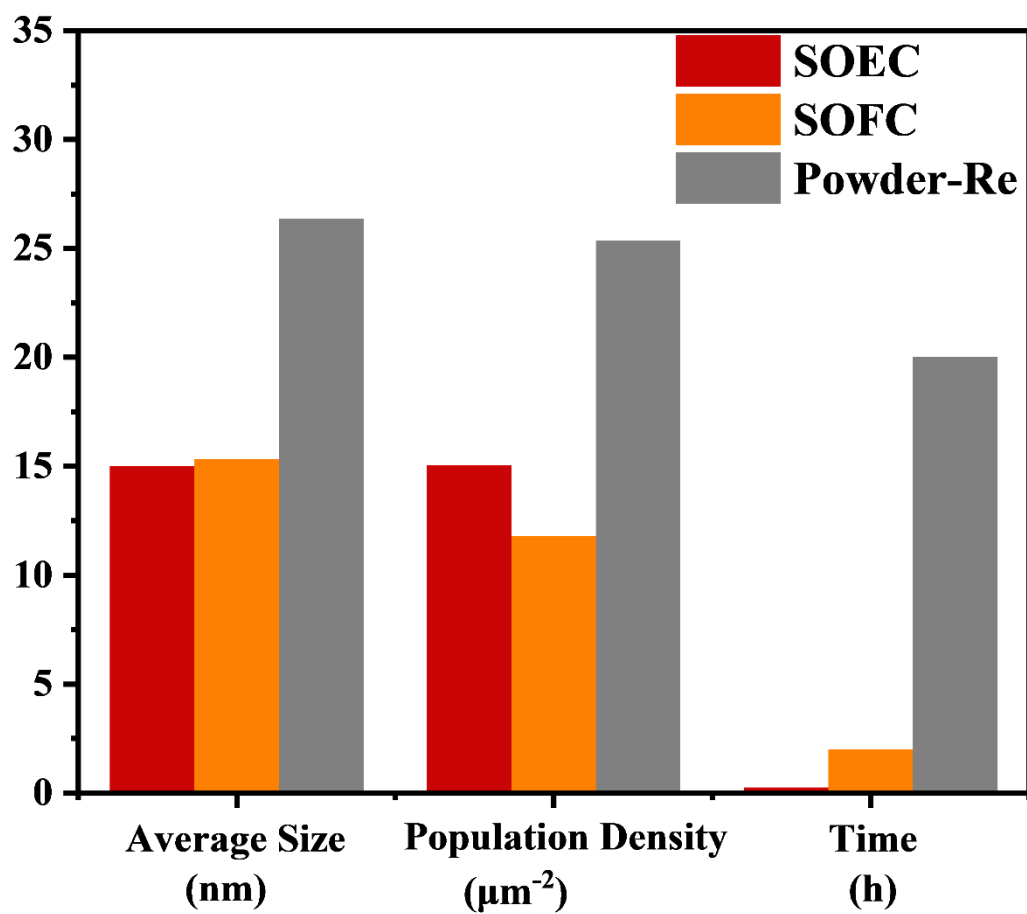

Fig. S10 Comparison of size, number and treatment time of Ni nanoparticles from different exsolution processes.
